## Global connectivity and networks of marine reserves

1 Julia McDowell<sup>1</sup>, Marco Andrello<sup>2,3</sup>, Laure Velez<sup>1</sup>, Nicolas Barrier<sup>2</sup>, Stephanie Manel<sup>4</sup>, Laura J.

2 Pollock<sup>5</sup>, David Mouillot<sup>1</sup>

3

4 <sup>1</sup> MARBEC, Univ Montpellier, Montpellier, France.

5 <sup>2</sup> MARBEC, Univ Montpellier, CNRS, Ifremer, IRD, Sète, France

6 <sup>3</sup> Institute for the Study of Anthropic Impacts and Sustainability in the Marine Environment, CNR-

7 IAS, c/o University Roma Tre, Rome RM

8 <sup>4</sup> CEFE, Univ Montpellier, CNRS, EPHE-PSL University, IRD, Montpellier, France

9 <sup>5</sup> Department of Biology, McGill University, Montréal, Canada

10

11

12 \* **Correspondence:**

13 Julia McDowell

14 [jmm553@cornell.edu](mailto:jmm553@cornell.edu)

15 **Keywords: networks, connectivity, marine, climate change, reserves, marine protected areas**

16 **Abstract**

17 Cooperation between countries in managing and protecting shared marine resources is beneficial both

18 ecologically and economically, but how best to establish the cooperation needed at a global scale is

19 largely unknown. Here, we used hydrodynamic modelling to identify ecologically connected

20 networks of marine reserves (MRs) and evaluated these networks with socio-economic indicators.

21 Most of the networks are homogenous with similar levels of development, shared languages, and

22 other cultural values. However, we found that 17% (11/66) of the largest networks (>20 MRs) span  
23 multiple countries. These heterogenous networks are composed of countries with different economic,  
24 political, and cultural views. Countries that control more, larger marine reserves also have a more  
25 even ratio of source reserves to sinks. We discuss that, while such economic and cultural  
26 homogeneity might lead to more efficient ecological management in the short term, heterogeneous  
27 networks may prove to be more resilient in the longer term, when climate change will modify marine  
28 connectivity.

## 29 **1 Introduction**

30 Marine ecosystems are highly threatened by anthropogenic pressures such as overfishing, repeated  
31 heat waves, and overuse (Hughes et al. 2019, O'Hara 2021). Marine protected areas (MPAs) are an  
32 effective way of mitigating some of these pressures (Roberts 2017, Duarte et al. 2020). MPAs restrict  
33 human use to protect both living and non-living resources making them useful management tools  
34 (Edgar 2014). Especially effective are marine reserves (MR), which are no-take MPAs (Costello &  
35 Ballantine 2015) that allow for larger fish and greater population sizes both within their boundaries  
36 and in the close vicinity (Edgar 2014, Ohayon 2021). In addition to the well-documented ecological  
37 and fisheries benefits, marine reserves can also promote tourism, human wellbeing, and alternative  
38 livelihood strategies (Ban et al. 2019). Given the potentially large benefits of marine reserves, it is  
39 important to understand which factors contribute the most to reserve success. There is evidence that  
40 successful reserves (e.g. those that have greater fish biomass relative to unprotected areas) have high  
41 compliance to fishing restrictions, are older, larger, and isolated from humans (Edgar et al. 2014;  
42 Cinner et al. 2018). What is less known is the impact of the greater network of reserves on  
43 effectiveness.

44 There are many reasons that the connectedness of reserves could be beneficial from a conservation  
45 perspective. Connectivity promotes source-sink dynamics, gene flow, demographic and genetic

46 rescue, and also assists in species range shifts (Andrello et al. 2017; Roberts, 2017; Manel et al.  
47 2019). Isolated marine reserves are slow to recover after disturbance events; the isolation impeding  
48 larval recruitment and significantly slowing recovery time (Olson 2019). Conversely, oceanic  
49 currents also mediate the spread of marine pollution, invasive species, and diseases (Jönsson &  
50 Watson 2016; Jaspers et al 2018). Therefore, hydrological connectivity among MRs across the  
51 seascape is a key process capable of modifying the functioning and the effectiveness of MR  
52 networks. Further, understanding how reserves are hydrodynamically connected is necessary to  
53 promote long-term ecological and socio-economic resilience under ever increasing disturbances;  
54 reserves designed with optimized connectivity in mind greatly improve the benefits of the reserve  
55 (Edgar 2014, Sala 2018, Goetze 2020). For these reasons, the Convention for Biological Diversity,  
56 through the post-2020 global framework for biodiversity current under discussion, recognizes that  
57 connectivity is a necessary component of MR networks and needs to be included in their design  
58 (<https://www.cbd.int/conferences/post2020>), and oceanographic connectivity is increasingly  
59 considered in spatial conservation planning (Maina 2019).

60  
61 So far, this progress in understanding how connectivity impacts marine reserves has mostly been  
62 ecological in nature. Understanding how political, economic, and societal collaboration among  
63 countries align with the ecological connectivity among their marine reserves at a global scale is  
64 largely unknown (Trembl et al 2015). It would be unfair to assume every country is capable of the  
65 same level of involvement in implementing new protected areas and reserves due to the high cost,  
66 and so managing connected networks will necessitate an understanding of the “burden” that each  
67 country is capable of sustaining (Maina 2019). Previous studies have shown that hydrodynamically  
68 connected networks of MRs can span Exclusive Economic Zones (EEZ) of multiple countries that  
69 have different standards of living with varying levels of governance, environmental performance, and  
70 dependency on marine resources (Andrello et al. 2017; Wendling et al 2020). Managing and

71 conserving connected ecosystems requires increasing levels of political and cultural connectedness  
72 and collaborations across scales and jurisdictions (Bodin 2016).

73

74 A broad coalition of environmental organizations are campaigning to protect at least 30% of the  
75 amount of land and sea by 2030 (Dinerstein 2019), but this effort could be hindered by our limited  
76 understanding of how countries interact within ecologically connected networks of MRs on a global  
77 scale. Countries that have a desired outcome in common, be it increased wealth, better environmental  
78 protections, or another goal should have an easier time creating policies that can be agreed upon by  
79 all parties involved. By contrast, countries with different ideas or with different dependencies upon  
80 marine areas for subsistence are less likely to reach common agreements regarding the levels of  
81 protection and management of marine areas (Tremblay 2015).

82

83 Here, we aim to document the large-scale connectivity between marine reserves and their degree of  
84 isolation while also characterizing the social configuration of reserve networks. We first identify all  
85 the hydrodynamically connected networks of marine reserves in the world, as well as the highly  
86 isolated reserves. We then identify the most well-connected countries, as well as countries that have  
87 significantly higher ratios of incoming or outgoing connections. We last describe the shared cultural,  
88 political, and economic characteristics of the countries which control the largest networks, in an  
89 attempt to understand why they are so successful in creating highly connected, multi-country  
90 networks.

91

## 92 **2 Materials and Methods**

### 93 **2.1 Marine protected areas and marine reserves**

94 The MPA database was downloaded from the World Database on Protected Areas and filtered to only  
95 keep protected areas known as ‘marine’ (WDPA, downloaded January 2019). From there we retained  
96 only the MRs that are either in IUCN category Ia or Ib or designated as at least partially no-take,  
97 since only marine reserves provide widely recognized ecological benefits (Turnbull 2021). The final  
98 database includes 2,203 marine protected areas that we refer to as marine reserves (MRs) in the  
99 following sections.

## 100 **2.2 Hydrodynamic connectivity between marine reserves**

101 We evaluated hydrodynamic connectivity using Lagrangian models of dispersal. We used sea surface  
102 current velocities from Copernicus Marine Environment Monitoring Service from January 2008 to  
103 March 2017. The horizontal resolution of the current velocity datasets was 1/12<sup>th</sup> degree, and the  
104 temporal resolution was one day. We released 10,000 virtual particles from the centroid of each  
105 marine reserve and tracked their trajectories using Ichthyop 3.3 (Lett et al. 2008). This was designed  
106 to show the trans-boundary dispersal, and not capture local retention and higher variability that could  
107 been seen with a higher resolution.

108 We calculated the probability of connection between all pairs of MRs. The spatial position of  
109 particles relative to MR polygons was assessed using the function ‘gContains’ in the R package rgeos  
110 0.3–19 (Bivand & Rundel, 2017) on the latitude and longitude of each particle. Connection  
111 probabilities were used to construct a connectivity matrix among all MRs. Each value is the  
112 probability that particles released in one marine reserve are recruited in another, thereby giving the  
113 probability of inputs and outputs of each marine reserve to and from all others. Networks are a set of  
114 connected MRs, and were determined using the ‘clusters’ function of the R package igraph 1.0.1  
115 (Csardi 2006). However, direction of the connection was disregarded to create the networks.

116

117 Networks were initially found for multiple pelagic particle durations, including 20, 40, and 60 days  
118 (Appendix 2, 3). Ultimately, we chose to analyze based on a 40-day particle duration because it is  
119 closest to the mean pelagic duration of fish larvae (Booth and Parkinson 2011, Graham et al. 2008,  
120 Jones et al. 2009).

121 We performed analyses at the network and at the country level. At the network level, we analyzed the  
122 indicators for countries involved in each individual network. At the country level, we analyzed the  
123 connections that the MRs controlled by each country have to other countries. More detailed methods  
124 are available in Appendix 1.

### 125 **2.3 Social, economic, and political indicators**

126 We used the fisheries dependency index and the human development index to characterize the  
127 socioeconomic dimensions of MR networks. The fisheries dependency index assesses the importance  
128 of a coastal country's fisheries in terms of their contributions to a national economy, employment,  
129 and food security (Andrello et al. 2017). The fisheries dependency index is bounded between 0 and  
130 100, with higher values indicating higher dependency. We used the 2018 Human Development Index  
131 (HDI) (United Nations Development Program, downloaded 2019) as an indicator of human  
132 development. The HDI is based on national statistics of life expectancy, education level, and gross  
133 national income per capita, ranges from 0 to 1, with higher values indicating higher development.

134  
135 We used the 2018 Environmental Performance Index (EPI) as an indicator of the importance each  
136 country places on the environment (Wendling et al 2020). The EPI ranks 180 countries on two dozen  
137 indicators spanning ten categories across environmental health and ecosystem vitality, including air  
138 pollution, climate and energy, and fisheries. The EPI is produced jointly by Yale University and  
139 Columbia University in collaboration with the world economic forum, ranges from 0 to 100, with  
140 higher values indicating higher importance placed on environmental issues.

141

142 Data on languages were taken from the Ethnologue Global Dataset compiled by SIL International, a  
143 comprehensive database of all languages present in each country (Eberhard 2019). It also documents  
144 the number of speakers, literacy rate, and characteristics of each language. In this study, we used the  
145 official language of the country, either *de facto* or *de jure*, in which language governmental and cross  
146 border issues would be discussed. If a country has two official languages, both were included in the  
147 analysis.

148

### 149 **3 Results**

#### 150 **3.1 The global structure of marine reserve networks**

151 We identified a total of 65 networks of marine reserves based on a cluster analysis. Out of 2,203  
152 marine reserves described at the time of the study, 1,618 (73.4%) are included in a network of more  
153 than one reserve. Of the 65 total networks, we further focused on the largest 11 networks that each  
154 are composed of 20 or more marine reserves (Fig. 1). These 11 networks contain 60.7% (1339) of  
155 marine reserves as well as 42.1% of the total surface area of all marine reserves.

156

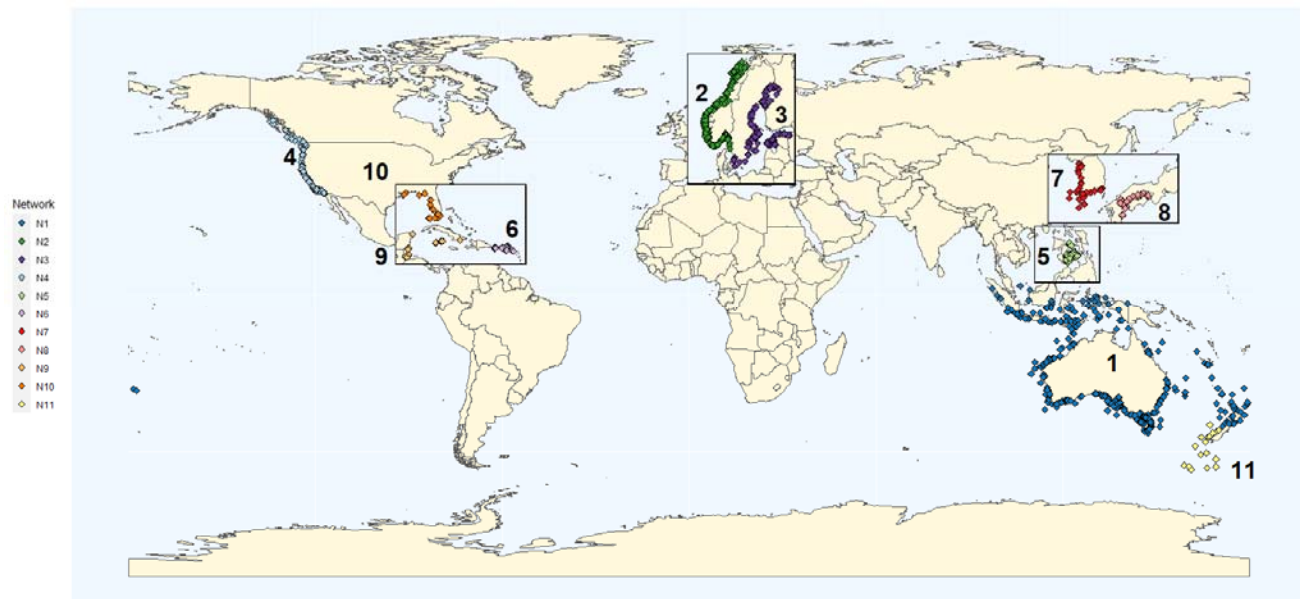

157

158 **Figure 1:** The 11 largest networks of marine reserves (with 20 or more connected reserves) based on  
159 a 40-day pelagic larval duration. See appendix 4 for detailed information on the country and language  
160 composition of each network.

161

162 The largest network in terms of the number and size of reserves links the Indian and Pacific oceans  
163 (N1, Fig. 1, Appendix 4). N1 has 475 reserves, spans five countries, and covers more than twice the  
164 area of the next largest reserve network. The second largest network in terms of the number of  
165 reserves is in the Norwegian Sea with 374 reserves, composed primarily of Norwegian reserves with  
166 a few Swedish reserves (N2, Fig. 1). Despite its high quantity of reserves, N2 is much smaller than  
167 N1 in terms of size, ranking 43rd by area covered out of all 66 networks. The other nine top networks  
168 range in size from 20 to 200 reserves. The third largest network is located in the Baltic region and  
169 three large networks are located in the Caribbean—one in the eastern Caribbean (N6), one in the  
170 western Caribbean (N9) and one in the Gulf of Mexico (N10). By contrast, Africa, South America,  
171 and Eastern Indian Ocean have no networks that rank in the top 11, despite each having multiple  
172 marine reserves. Similar to the number and size of reserves in each network, the number of involved



173 countries is also variable ranging from multi-national networks spanning five countries (N1 in and  
174 around Australia and N6 in the easter Caribbean) to networks completely within the domain of a  
175 single country. Of the total 66 networks identified, 51 of them are single nation networks.

176

177 While most marine reserves are connected to at least one other reserve, 585 (26.6%) out of the  
178 analyzed reserves are not connected to any single other reserve. These isolated reserves are  
179 widespread (Figure 2), even in areas that are regionally dominated by large networks. For example,  
180 Australia, Norway, and Sweden are all surrounded by isolated marine reserves while at the same time  
181 being the locations of the top three largest networks. These isolated reserves are not always small;  
182 isolated reserves are some of the largest by area with eight of them each covering 10,000 square  
183 kilometers. For example, the South Georgia and South Sandwich Island marine reserve is over 1.24  
184 million square kilometers, yet has no probability of connectivity to other sources. However, most  
185 isolated reserves (394, or 57.9%) are less than 1 square kilometer and 490 (78.0%) are under 10  
186 square kilometers. Many of the smallest marine reserves are located in Norway and Sweden, an area  
187 of generally high connectivity.

188

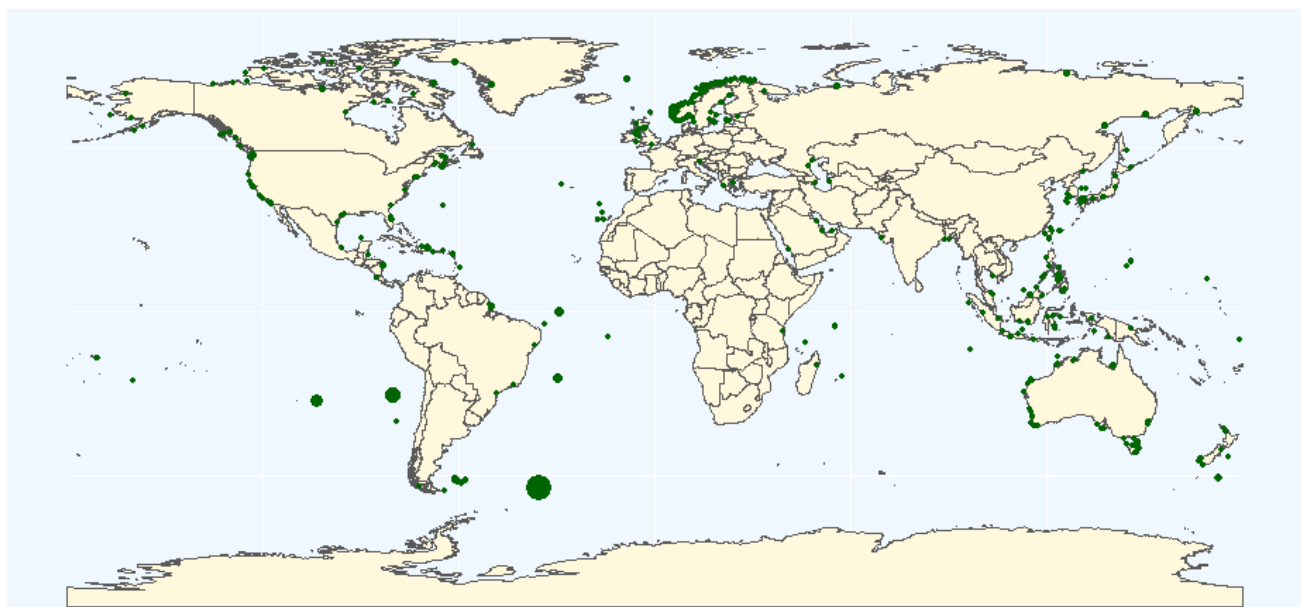

189

190

191 **Figure 2:** Isolated marine reserves that are not connected to any others with a PLD of 40 days. Dots  
192 show the relative surface area of each reserve.

193

### 194 **3.2 Relationship between country protection coverage and connectedness**

195 While networks were designated without directionality, the probability matrix does show which  
196 reserves act as sources and sinks. Combining reserves by country provides an overview of the  
197 hydrodynamics that connect countries, as opposed to individual reserves. This explains the flow of  
198 resources and shows which countries most benefit from incoming larval dispersal, and which  
199 countries can primarily serve as a source of larvae. Countries that act only as sources or sinks tend to  
200 control few marine reserves and, therefore, have few overall connections. For example, the  
201 Seychelles (8 reserves in total) have 3 outgoing connections but no incoming connections, while the  
202 Dominican Republic (2 reserves total) has 5 incoming connections but only 1 outgoing. Countries  
203 with more reserves show better connectivity and have a more equal ratio of incoming to outgoing  
204 connections. The USA is a good model for high connectivity with a good incoming to outgoing ratio:  
205 it manages both a large area of reserves and a high number of reserves, in total it has 186 reserves  
206 with 19 external connections, 11 of which are incoming and 8 are outgoing. Norway is also an  
207 extreme case, with many more reserves than any other country, but low surface coverage. Norway is  
208 also not highly connected to other countries, with external connections to only three countries despite  
209 controlling 610 reserves.

210

211

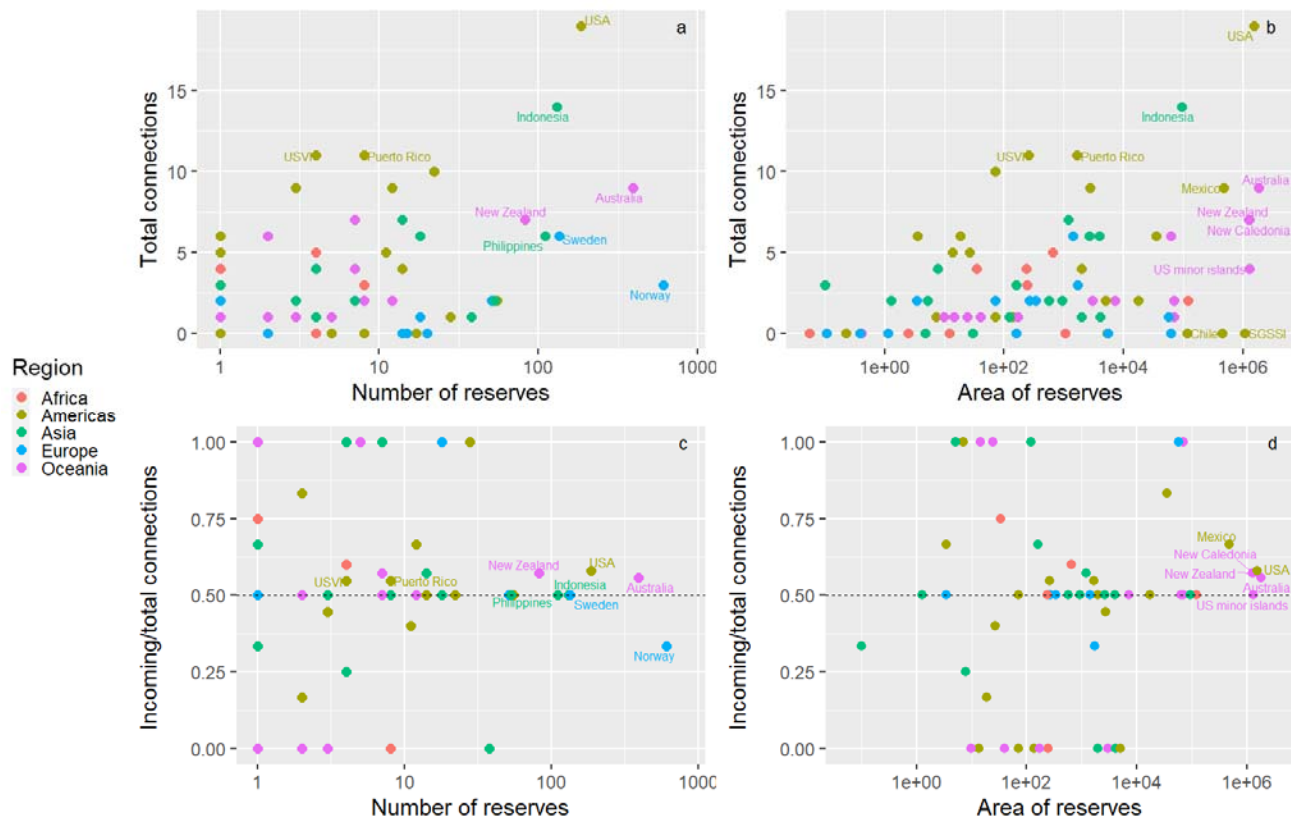

212

213 **Figure 3:** How the MRs of each country relate to that country's hydrological connections to other

214 countries, including how the number (a) and area (b) of MRs of one country relate to the total

215 connections to all other countries within the same ecological network. The percent of connections in

216 each country that are incoming only is show vs the number of reserves in (c) and vs the area of

217 reserves in (d). Points are countries and point colors are geographic regions.

218

219 Overall, countries with more and larger marine reserves tend to be more connected to other countries

220 (Figure 3). Both the number and size of reserves relate to the external connectivity a country has, but

221 the size of reserves has a slightly stronger but still not significant relationship to the external

222 connectivity than number of reserves has. Some countries have an unexpectedly high number of

223 connections given their number and size of reserves, such as the US Virgin Islands, which has few

224 reserves but many connections and overall a relatively even distribution of incoming to outgoing

225 connections.

226

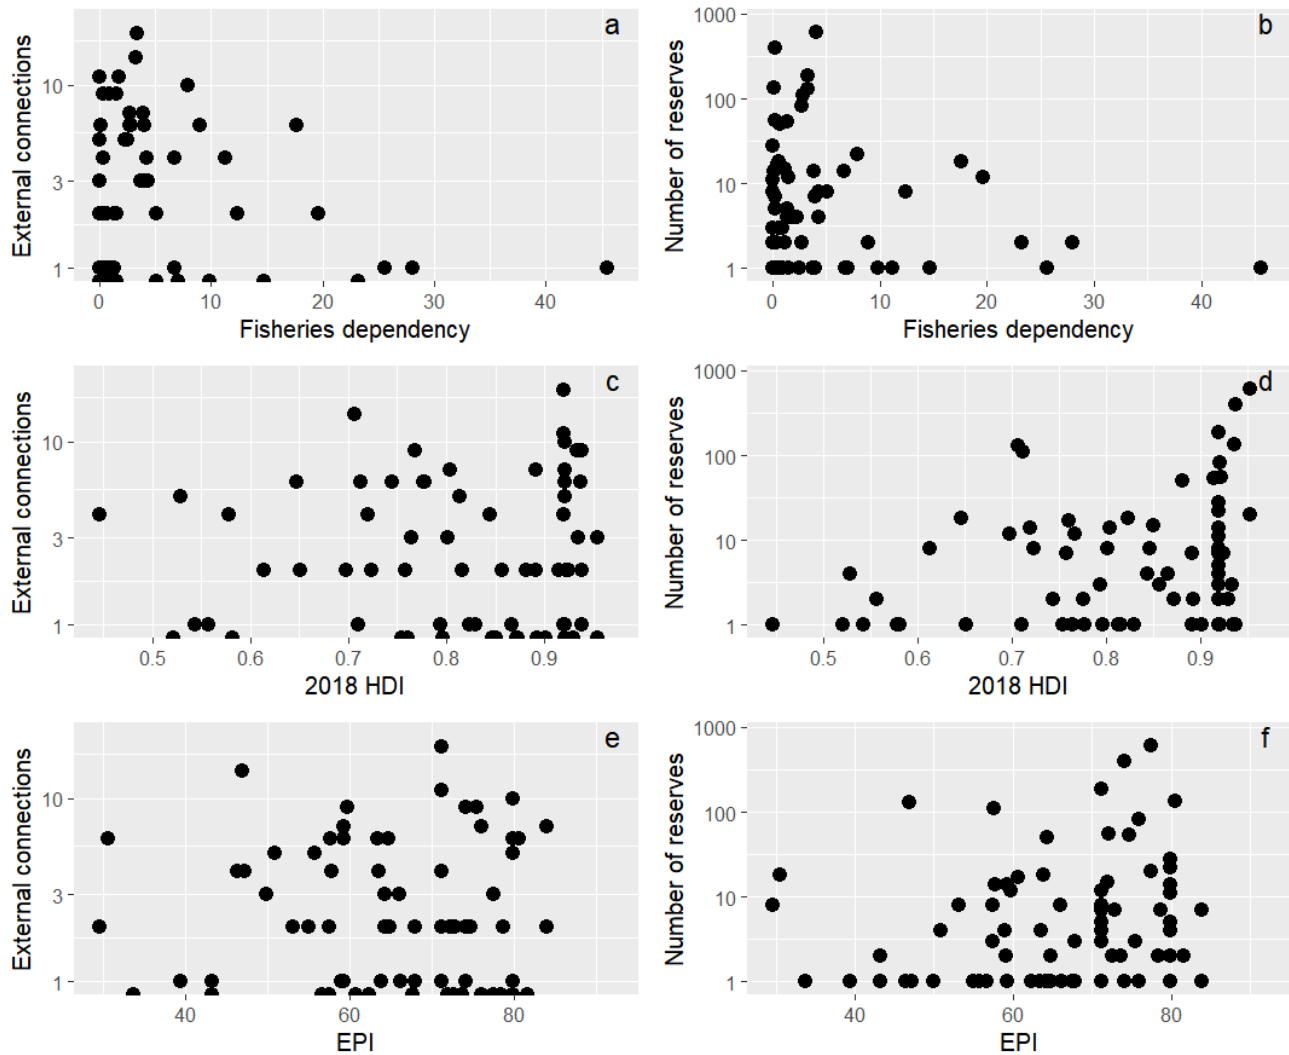

227

228 **Figure 4:** the number of external connections and the number of reserves controlled relate to the

229 social, economic, and cultural characteristics of the countries that manage the reserves. External

230 connections as a function of a) fisheries dependency, c) human development index and e)

231 environmental performance index. Total number of reserves controlled by a country as a function of

232 b) fisheries dependency, d) human development index, and f) environmental performance index.

233

234

235 The number of connections to other countries' marine reserves is more dependent on the total area of

236 reserves each country controls, rather than the number of reserves (Figure 3). However, countries

237 with a high number of reserves, as well as a high number of external connections are more likely to  
238 have a high human development index, have a low fisheries dependency score, and have a high  
239 environmental performance index (Figure 4).

240

#### 241 **4 Discussion**

242 Overall, we found that the majority of marine reserves (73.4%) are connected to at least one other  
243 reserve, and of these networks more are very well connected in a large (>20 MR) network (60.7%).  
244 Of the seven largest networks that span multiple countries, few have diverse social and political  
245 indicators, and tend to be managed by countries with similar economic indicators. Our main results  
246 show that: 1) while most marine reserves across the globe are connected to other reserves, many are  
247 connected in large networks of more than 20 separate reserves that span multiple diverse countries, 2)  
248 isolated reserves make up a significant portion of total reserves (26.6%) and are present across the  
249 world, 3) and connections between marine reserves are directional, implying that some of them, and  
250 countries that control them, are likely to act more as sources or as sinks.

251

252 Here, we find that the majority of the highly connected networks are managed by multiple countries,  
253 meaning successful management of most of the world's largest ecological networks will require  
254 coordination between countries. Countries with a high human development index have the most  
255 connections because they have the most reserves, as previously recognized (Marinesque et al. 2012).  
256 Countries with similar sociopolitical characteristics have fewer barriers to coordination; for example,  
257 Network 2 is split between Norway and Sweden, which both have a high human development index,  
258 a strong focus on the environment, and low fisheries dependency, as well as sharing a border. Canada  
259 and the United States also share a large network, as do Australia and New Zealand. These networks  
260 are likely to have an immediate advantage over networks with divergent cultural or socioeconomic

261 attributes in terms of management and communication (Cámara-Leret 2019, Wang 2015, Putnam  
262 2008). Over time however, higher levels of diversity have been shown to create better societies, as  
263 long as there is a common goal (Page 2008), so while diverse decision maker groups may prove to  
264 have lower levels of social trust in the first stages of cooperation, over the longer-term diverse  
265 networks could prove to be more ecologically efficient (Wang 2015). In addition, networks with a  
266 diverse range of EPIs might bolster the protection efforts of the included countries with lower EPIs  
267 with an overall positive effect.

268

269 Though connected networks are more prevalent, isolated reserves are well represented around the  
270 world, both in places with large networks and without. Isolated reserves near large networks are  
271 likely to be smaller, but make for good candidates to connect to the nearby large networks in the  
272 future. Many isolated large reserves in the open ocean are in highly diverse areas such as the  
273 Southern Atlantic. Isolated reserves are in danger of slower recovery after catastrophic events, and in  
274 having lower gene diversity. Identifying sites that are highly connected to, but not currently part of, a  
275 marine reserve or protected area is another good way to find new sites to extent existing networks of  
276 protected areas to achieve the ambitious goals of the post-2020 biodiversity framework (Magris et al  
277 2018).

278

279 Many countries have asymmetric connectivity, and act primarily as either sources or sinks. As the  
280 number of reserves managed by a country increases, so does the symmetry. This is probably a  
281 sampling effect, caused by the fact that increasing the number of reserves will also increase the  
282 chances of including both source and sink reserves. Not only is the level of connectivity important,  
283 but the direction of the connectivity is also. Effectively connected networks can only be created if the  
284 importance of the direction of connection is taken into consideration by the managing body of the  
285 network.

286 Larval dispersal has the potential to reach up to hundreds of kilometers outside of reserves based on  
287 biophysical models, and recruitment from external sources can be a valuable component of recovery  
288 and persistence of coral reefs, with some reefs acting as sources for larvae and other more connected  
289 reserves acting as stepping-stones aiding in dispersal (Roberts 2017, Alvarez-Romero 2018). Larval  
290 dispersal is however mediated by larval behavior such as active swimming and orientation, and can  
291 result in different patterns of marine reserve connectivity compared to those identified using  
292 hydrodynamic connectivity (Faillettaz et al 2018). The identity and size of the marine reserve  
293 networks identified here might therefore be different when considered under the lens of marine larval  
294 dispersal.

295  
296 These results demonstrate the need for more research into how different countries that share an  
297 ecological network interact regarding management measures. While this work gives a snapshot of  
298 similarities between countries, it does not delve into the actual interactions between the countries  
299 with regards to marine management and how external connectivity is managed. Identifying key areas  
300 of connectivity and ensuring convergent management styles to protect these areas would help  
301 countries better protect their marine resources, help vulnerable populations that depend on the sea for  
302 their livelihoods, and help mitigate some of the impacts of anthropogenic climate change.

## 303 **5 Conflict of Interest**

304 *The authors declare that the research was conducted in the absence of any commercial or financial*  
305 *relationships that could be construed as a potential conflict of interest.*

## 306 **6 Author Contributions**

307 JM, DM, and MA conceived of the study, LV and NB contributed to analysis, JM wrote the first draft, and all  
308 authors commented on the manuscript.

## 309 7 Funding

310 Funding was provided by the French governments “Make our planet great again” PhD scholarship

## 311 8 References

- 312 1. Álvarez-Romero, J.G., Munguía-Vega, A., Beger, M., del Mar Mancha-Cisneros, M., Suárez-  
313 Castillo, A.N., Gurney, G.G., Pressey, R.L., Gerber, L.R., Morzaria-Luna, H.N., Reyes-  
314 Bonilla, H., Adams, V.M., Kolb, M., Graham, E.M., VanDerWal, J., Castillo-López, A.,  
315 Hinojosa-Arango, G., Petatán-Ramírez, D., Moreno-Baez, M., Godínez-Reyes, C.R. & Torre,  
316 J. (2018). Designing connected marine reserves in the face of global warming. *Glob. Chang.*  
317 *Biol.*, 24, e671–e691.
- 318 2. Andrello, M., Guilhaumon, F., Albouy, C., Parravicini, V., Scholtens, J., Verley, P., Barange,  
319 M., Sumaila, U.R., Manel, S. & Mouillot, D. (2017). Global mismatch between fishing  
320 dependency and larval supply from marine reserves. *Nat. Commun.*, 8.
- 321 3. Ban, N.C., Gurney, G.G., Marshall, N.A., Whitney, C.K., Mills, M., Gelcich, S., Bennett,  
322 N.J., Meehan, M.C., Butler, C., Ban, S., Tran, T.C., Cox, M.E. & Breslow, S.J. (2019). Well-  
323 being outcomes of marine protected areas. *Nat. Sustain.*, 2, 524–532.
- 324 4. Bivand R, Rundel C (2017) rgeos: Interface to geometry engine-open source ('geos'). R  
325 package version 0.3-26. <https://CRAN.R-project.org/package=rgeos>
- 326 5. Bodin, Ö., Robins, G., Mcallister, R.R.J.J., Guerrero, A.M., Tengö, M., Lubell, M., Crona, B.,  
327 Tengö, M. & Lubell, M. (2016). Theorizing benefits and constraints in collaborative  
328 environmental governance: A transdisciplinary social-ecological network approach for  
329 empirical investigations. *Ecol. Soc.*, 21.



- 330 6. Booth, D.J. & Parkinson, K. (2011). Pelagic larval duration is similar across 23° of latitude  
331 for two species of butterflyfish (Chaetodontidae) in eastern Australia. *Coral Reefs*, 30, 1071–  
332 1075.
- 333 7. Cámara-Leret, R., Fortuna, M.A. & Bascompte, J. (2019). Indigenous knowledge networks in  
334 the face of global change. *Proc. Natl. Acad. Sci. U. S. A.*, 116, 9913–9918.
- 335 8. Cinner, J.E., Maire, E., Huchery, C., Aaron MacNeil, M., Graham, N.A.J., Mora, C.,  
336 McClanahan, T.R., Barnes, M.L., Kittinger, J.N., Hicks, C.C., D’Agata, S., Hoey, A.S.,  
337 Gurney, G.G., Feary, D.A., Williams, I.D., Kulbicki, M., Vigliola, L., Wantiez, L., Edgar,  
338 G.J., Stuart-Smith, R.D., Sandin, S.A., Green, A., Hardt, M.J., Beger, M., Friedlander, A.M.,  
339 Wilson, S.K., Brokovich, E., Brooks, A.J., Cruz-Motta, J.J., Booth, D.J., Chabanet, P.,  
340 Gough, C., Tupper, M., Ferse, S.C.A., Rashid Sumaila, U., Pardede, S. & Mouillot, D.  
341 (2018). Gravity of human impacts mediates coral reef conservation gains. *Proc. Natl. Acad.*  
342 *Sci. U. S. A.*, 115, E6116–E6125.
- 343 9. Costello, M.J. & Ballantine, B. (2015). Biodiversity conservation should focus on no-take  
344 Marine Reserves: 94% of Marine Protected Areas allow fishing. *Trends Ecol. Evol.*, 30, 507–  
345 509.
- 346 10. Csardi G, Nepusz T (2006). “The igraph software package for complex network  
347 research.” *InterJournal, Complex Systems*, 1695. <https://igraph.org>.
- 348 11. CTI-CFF Regional Secretariat (2016). Annual Activities Report 2015-2016.  
349 [coraltriangleinitiative.org](http://coraltriangleinitiative.org)
- 350 12. D. Putnam’s “E Pluribus Unum: Diversity and community in the twenty-first century the  
351 2006 Johan Skytte Prize Lecture.” *Hous. Policy Debate*, 19, 207.
- 352 13. Dinerstein, E., Vynne, C., Sala, E., Joshi, A.R., Fernando, S., Lovejoy, T.E., Mayorga, J.,  
353 Olson, D., Asner, G.P., Baillie, J.E.M., Burgess, N.D., Burkart, K., Noss, R.F., Zhang, Y.P.,

- 354 Baccini, A., Birch, T., Hahn, N., Joppa, L.N. & Wikramanayake, E. (2019). A Global Deal  
355 for Nature: Guiding principles, milestones, and targets. *Sci. Adv.*, 5, 1–18.
- 356 14. Duarte, C.M., Agusti, S., Barbier, E., Britten, G.L., Castilla, J.C., Gattuso, J.P., Fulweiler,  
357 R.W., Hughes, T.P., Knowlton, N., Lovelock, C.E., Lotze, H.K., Predragovic, M.,  
358 Poloczanska, E., Roberts, C. & Worm, B. (2020). Rebuilding marine life. *Nature*, 580, 39–51.
- 359 15. Eberhard, David M., Gary F. Simons, and Charles D. Fennig (eds.). (2019). *Ethnologue:*  
360 *Languages of the World*. Twenty-second edition. Dallas, Texas: SIL International.
- 361 16. Edgar, G.J., Stuart-Smith, R.D., Willis, T.J., Kininmonth, S., Baker, S.C., Banks, S., Barrett,  
362 N.S., Becerro, M.A., Bernard, A.T.F., Berkhout, J., Buxton, C.D., Campbell, S.J., Cooper,  
363 A.T., Davey, M., Edgar, S.C., Försterra, G., Galván, D.E., Irigoyen, A.J., Kushner, D.J.,  
364 Moura, R., Parnell, P.E., Shears, N.T., Soler, G., Strain, E.M.A. & Thomson, R.J. (2014).  
365 Global conservation outcomes depend on marine protected areas with five key features.  
366 *Nature*, 506, 216–220.
- 367 17. Faillettaz, R., Paris, C. B., and Irisson, J. O. (2018). Larval fish swimming behavior alters  
368 dispersal patterns from marine protected areas in the North-Western Mediterranean Sea.  
369 *Front. Mar. Sci.* 5, 1–12. doi:10.3389/fmars.2018.00097.
- 370 18. Goetze, J.S., Wilson, S., Radford, B., Fisher, R., Langlois, T.J., Monk, J., Knott, N.A.,  
371 Malcolm, H., Currey-, L.M., Daniel, R., David, I., Barrett, N., Babcock, R.C., Bosch, N.E.,  
372 Brock, D., Claudet, J., Clough, J., Fairclough, D. V, Heupel, M.R., Holmes, T.H., Huveneers,  
373 C., Jordan, A.R., Mclean, D., Meekan, M., Miller, D., Newman, S.J., Rees, M.J., Roberts,  
374 K.E., Saunders, B.J., Speed, C.W., Eric, J.T., Sasha, T., Corey, K.W. & Harvey, E.S. (2021).  
375 Increased connectivity and depth improve the effectiveness of marine reserves, 3432–3447.
- 376 19. Graham, E.M., Baird, A.H. & Connolly, S.R. (2008). Survival dynamics of scleractinian coral  
377 larvae and implications for dispersal. *Coral Reefs*, 27, 529–539.

- 378 20. Hughes, T.P., Kerry, J.T., Connolly, S.R., Baird, A.H., Eakin, C.M., Heron, S.F., Hoey, A.S.,  
379 Hoogenboom, M.O., Jacobson, M., Liu, G., Pratchett, M.S., Skirving, W. & Torda, G. (2019).  
380 Ecological memory modifies the cumulative impact of recurrent climate extremes. *Nat. Clim.*  
381 *Chang.*, 9, 40–43.
- 382 21. Jaspers, C., Huwer, B., Antajan, E., Hosia, A., Hinrichsen, H.H., Biastoch, A., Angel, D.,  
383 Asmus, R., Augustin, C., Bagheri, S., Beggs, S.E., Balsby, T.J.S., Boersma, M., Bonnet, D.,  
384 Christensen, J.T., Dänhardt, A., Delpy, F., Falkenhaus, T., Finenko, G., Fleming, N.E.C.,  
385 Fuentes, V., Galil, B., Gittenberger, A., Griffin, D.C., Haslob, H., Javidpour, J., Kamburska,  
386 L., Kube, S., Langenberg, V.T., Lehtiniemi, M., Lombard, F., Malzahn, A., Marambio, M.,  
387 Mihneva, V., Møller, L.F., Niermann, U., Okyar, M.I., Özdemir, Z.B., Pitois, S., Reusch,  
388 T.B.H., Robbens, J., Stefanova, K., Thibault, D., van der Veer, H.W., Vansteenbrugge, L.,  
389 van Walraven, L. & Woźniczka, A. (2018). Ocean current connectivity propelling the  
390 secondary spread of a marine invasive comb jelly across western Eurasia. *Glob. Ecol.*  
391 *Biogeogr.*, 27, 814–827.
- 392 22. Jones, G.P., Almany, G.R., Russ, G.R., Sale, P.F., Steneck, R.S., Van Oppen, M.J.H. &  
393 Willis, B.L. (2009). Larval retention and connectivity among populations of corals and reef  
394 fishes: History, advances and challenges. *Coral Reefs*, 28, 307–325.
- 395 23. Jönsson, B.F. & Watson, J.R. (2016). The timescales of global surface-ocean connectivity.  
396 *Nat. Commun.*, 7, 1–6.
- 397 24. Lett, C., Verley, P., Mullon, C., Parada, C., Brochier, T., Penven, P. & Blanke, B. (2008). A  
398 Lagrangian tool for modelling ichthyoplankton dynamics. *Environ. Model. Softw.*, 23, 1210–  
399 1214.
- 400 25. Magris, R.A., Andrello, M., Pressey, R.L., Mouillot, D., Dalongeville, A., Jacobi, M.N. &  
401 Manel, S. (2018). Biologically representative and well-connected marine reserves enhance  
402 biodiversity persistence in conservation planning. *Conserv. Lett.*, 11, 1–10.

- 403 26. Manel, S., Loiseau, N., Andrello, M., Fietz, K., Goñi, R., Forcada, A., Lenfant, P.,  
404 Kininmonth, S., Marcos, C., Marques, V., Mallol, S., Pérez-Ruzafa, A., Breusing, C., Puebla,  
405 O. & Mouillot, D. (2019). Long-Distance Benefits of Marine Reserves: Myth or Reality?  
406 *Trends Ecol. Evol.*, 34, 342–354.
- 407 27. Marinesque, S., Kaplan, D. M., and Rodwell, L. D. (2012). Global implementation of marine  
408 protected areas: Is the developing world being left behind? *Mar. Policy* 36, 727–737.  
409 doi:10.1016/j.marpol.2011.10.010.
- 410 28. O’Hara, C. C., Frazier, M., and Halpern, B. S. (2021). At-risk marine biodiversity faces  
411 extensive, expanding, and intensifying human impacts. *Science* (80-. ). 372, 84–87.  
412 doi:10.1126/science.abe6731.
- 413 29. O’Leary, B.C., Ban, N.C., Fernandez, M., Friedlander, A.M., García-Borboroglu, P., Golbuu,  
414 Y., Guidetti, P., Harris, J.M., Hawkins, J.P., Langlois, T., McCauley, D.J., Pikitch, E.K.,  
415 Richmond, R.H. & Roberts, C.M. (2018). Addressing Criticisms of Large-Scale Marine  
416 Protected Areas. *Bioscience*, 68, 359–370.
- 417 30. Ohayon, S., Granot, I. & Belmaker, J. (n.d.). marine protected areas.
- 418 31. Page SE. (2008). *How the Power of Diversity Creates Better Groups, Firms, Schools, and*  
419 *Societies*. Princeton University Press.
- 420 32. Roberts, C.M., O’Leary, B.C., Mccauley, D.J., Cury, P.M., Duarte, C.M., Lubchenco, J.,  
421 Pauly, D., Sáenz-Arroyo, A., Sumaila, U.R., Wilson, R.W., Worm, B. & Castilla, J.C. (2017).  
422 Marine reserves can mitigate and promote adaptation to climate change. *Proc. Natl. Acad.*  
423 *Sci. U. S. A.*, 114, 6167–6175.
- 424 33. Sala, E. & Giakoumi, S. (2018). No-take marine reserves are the most effective protected  
425 areas in the ocean. *ICES J. Mar. Sci.*, 75, 1166–1168.
- 426 34. Smith, T.W., Kim, J. & Son, J. (2017). Public Attitudes toward Climate Change and Other  
427 Environmental Issues across Countries. *Int. J. Sociol.*, 47, 62–80.

- 428 35. Treml, E.A., Fidelman, P.I.J., Kininmonth, S., Ekstrom, J.A. & Bodin, Ö. (2015). Analyzing  
429 the (Mis) Fit Between Institutional and Ecological Networks. *Glob. Environ. Chang.*, 31,  
430 263–271.
- 431 36. Turnbull, J.W., Johnston, E.L. & Clark, G.F. (2021). Evaluating the social and ecological  
432 effectiveness of partially protected marine areas, 35, 921–932.
- 433 37. UNDP. 2018. 2018 Statistical Update: Human Development Indices and Indicators. New  
434 York. <http://hdr.undp.org/en/content/human-development-indices-indicators-2018> (accessed  
435 January 2019)
- 436 38. UNEP-WCMC and IUCN. Protected planet: The World Database on Protected Areas  
437 (WDPA). UNEP-WCMC and IUCN, Cambridge, UK. Available from  
438 [www.protectedplanet.net](http://www.protectedplanet.net) (accessed January 2019).
- 439 39. Wang, C. & Steiner, B. (2015). Can Ethno-Linguistic Diversity Explain Cross-Country  
440 Differences in Social Capital?: A Global Perspective. *Econ. Rec.*, 91, 338–366.
- 441 40. Wendling, Z. A., Emerson, J. W., de Sherbinin, A., Esty, D. C., *et al.* (2020). *2020*  
442 *Environmental Performance Index*. New Haven, CT: Yale Center for Environmental Law &  
443 Policy. [epi.yale.edu](http://epi.yale.edu)

## 444 **9 Data Availability Statement**

445 The datasets analyzed for this study can be found in the Protected Planet database  
446 [<https://www.protectedplanet.net/en/thematic-areas/marine-protected-areas>].
